# Supplementary material for: Exploring Rhodospirillum rubrum response to high doses of carbon monoxide under light and dark conditions
Source: Springer Nature journal article supplement (doi:10.1007/s00253-024-13079-5), 2024-03-11
Supplement: MOESM1 [file 253_2024_13079_MOESM1_ESM.pdf]

## Exploring *Rhodospirillum rubrum* response to high doses of carbon monoxide under light and dark conditions.

Manuel S. Godoy<sup>1,2,\*</sup>, Irene Verdú<sup>1,†</sup>, Santiago R. de Miguel<sup>1,2</sup>, José D. Jiménez<sup>1,2</sup>, M. Auxiliadora Prieto<sup>1,2,\*</sup>

<sup>1</sup>Polymer Biotechnology Lab, Biological Research Centre Margarita Salas, Spanish National Research Council (CSIC), Madrid, Spain.

<sup>2</sup>Interdisciplinary Platform for Sustainable Plastics towards a Circular Economy-CSIC (SusPlast-CSIC), Madrid, Spain.

<sup>†</sup>Current address: Drexel University, Philadelphia, Pennsylvania, United States.

\*Corresponding authors: auxi@cib.csic.es, msgodoy@cib.csic.es

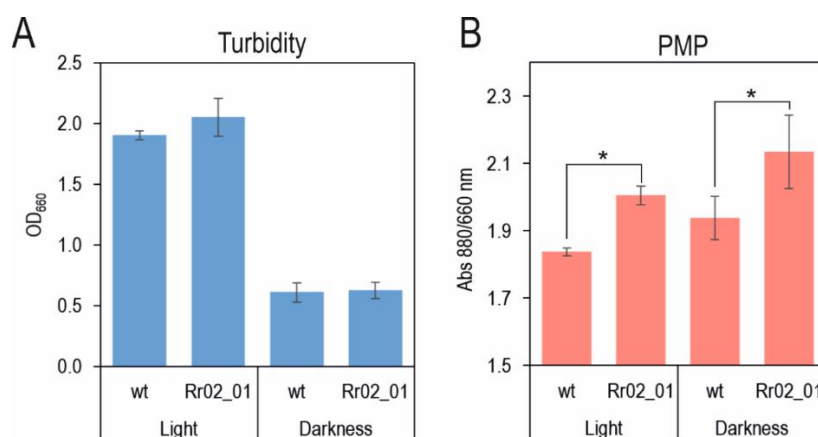

**Fig. S1: Comparison between strains Rr02\_01 and wild type (S1).** Precultures were grown anaerobically in RRNCO medium under light without CO. The inoculum was transferred to the same medium but with ppCO 0.6 bar, and grown under light or darkness. When the acetate was depleted, the turbidity (A) and the PMP (B) were determined. Significant differences were observed in PMP under both light and darkness (+9.1% and +10.1%, respectively). Values represent the mean and the error bars the standard deviation of at least three biological replicates. \* denotes significance with p-value <0.05 (unpaired two-tailed Student's test).

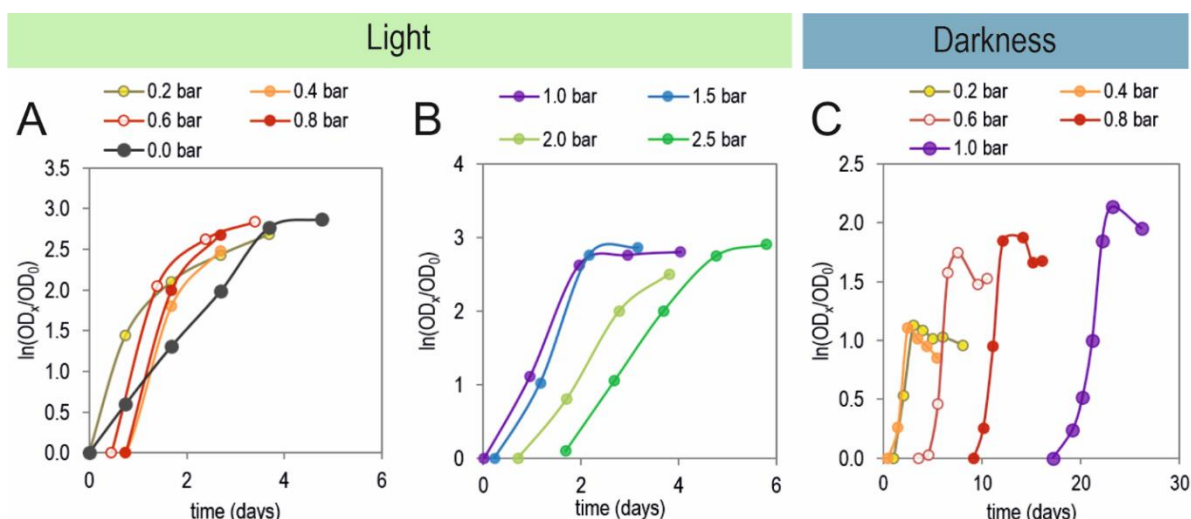

**Fig S2. Logarithmic representation of the growth curves under different levels of CO until reaching the stationary phase.** Photoheterotrophic cultures grown with an initial ppCO ranging from (A) 0.0 to 0.8 bar and from (B) 1.0 to 2.5 bar. (C) Cultures grown in darkness (initial ppCO ranging from 0.2 to 1.0 bar). Curves represent the  $\ln(OD_x/OD_0)$ , where  $OD_x$  is the  $OD_{660}$  at a given time (x) and  $OD_0$  is the initial (x=0)  $OD_{660}$ . Standard deviation was less than 10% in all cases (n=3).

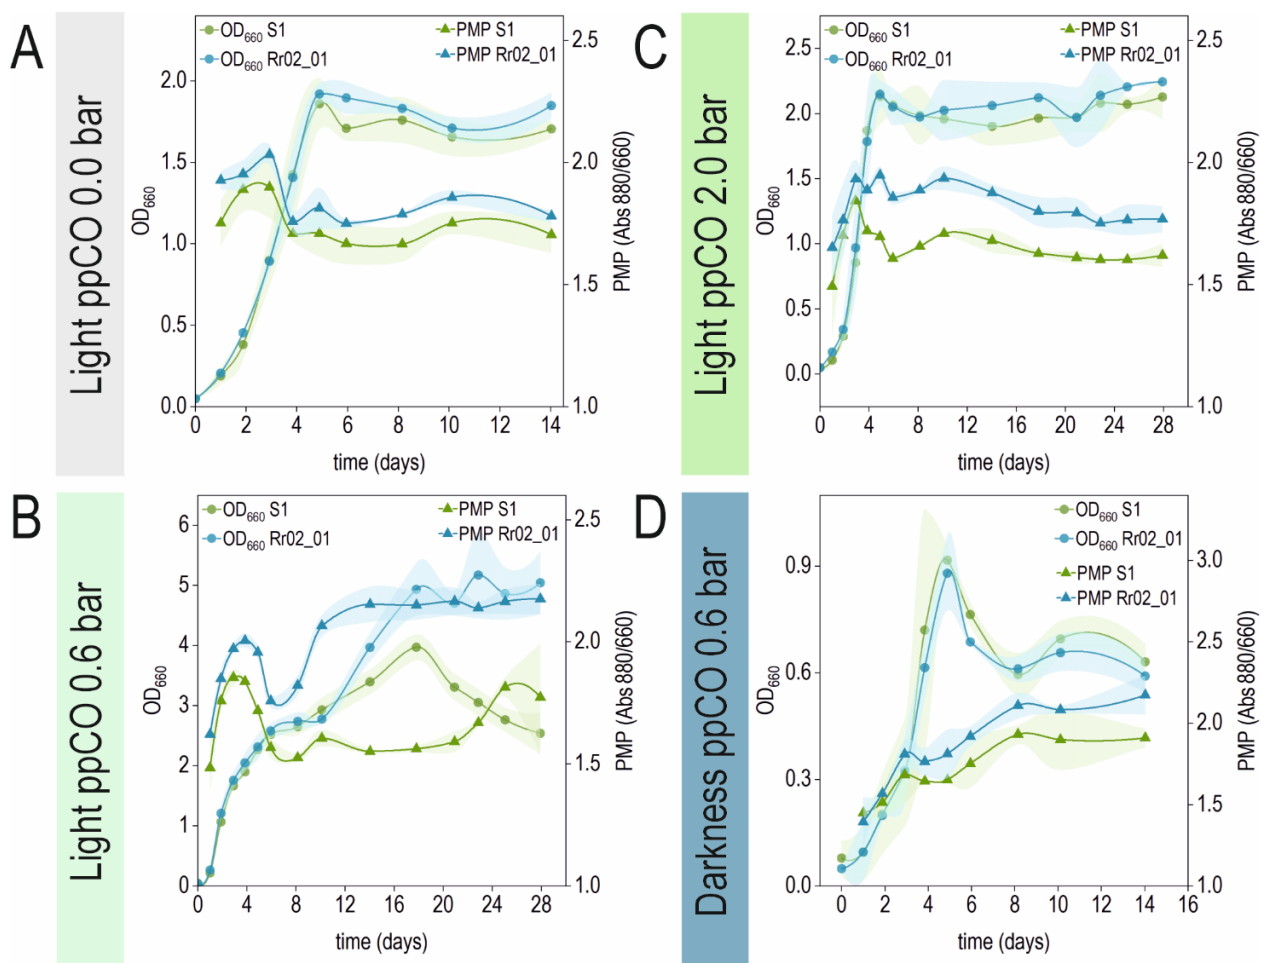

**Fig. S3: Comparison between strain Rr02\_01 and its parental strain S1.** Representative curves of both strains cultured in modified RRNCO medium at different initial ppCO. Photoheterotrophic cultures were conducted with an initial ppCO of 0.0 bar (A), 0.6 bar (B) or 2.0 bar (C). Cultures in darkness were evaluated with ppCO of 0.6 bar (D). As expected, PMP was higher for strain Rr02\_01, whereas the turbidity was quite similar for all the conditions. The exception was the evolution of the biomass under light with ppCO 0.6 bar. The second growth phase in strain Rr02\_01 reaches much higher levels of OD<sub>660</sub> and the difference of the PMP is the highest compared to the other three conditions. The shadow denotes the standard deviation (n = 3).

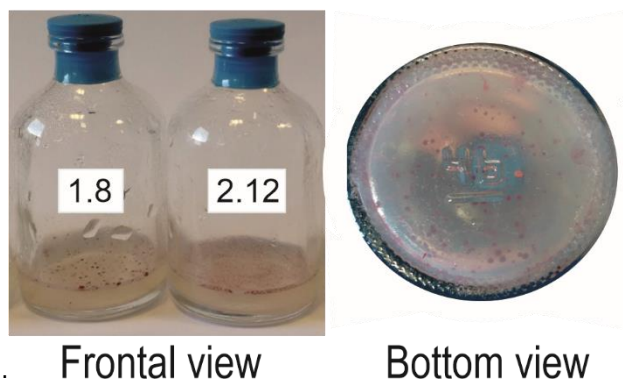

**Fig. S4: Pictures of the bottles used to isolate UV-mutant clones.** Frontal and bottom views of the bottles containing the solid medium (RRNCO-Acetate 10 mM, agar 1.5% m/v) were filled with CO (0.8 bar) to maintain the selective pressure during this step. Colonies can be observed on the surface of the agar.

**Table S1: Type of lamps and intensities used in different labs**

| Type of lamp | Manufacturer | Product description          | Intensity*  |                                                     | Reference |
|--------------|--------------|------------------------------|-------------|-----------------------------------------------------|-----------|
|              |              |                              | lux         | $\mu\text{mol}\cdot\text{m}^{-2}\cdot\text{s}^{-1}$ |           |
| LT           | Philips      | Master TL-D 18W/865          | 2300        | 31                                                  | This work |
| LED          | Sencys       | 10 W, 100 lm, 2650 K         | 2650-7950   | 50 - 150                                            | 1         |
| LT           | Osram        | Dulux L 55 W/865, 6500 K     | 7400        | 100                                                 | 2         |
| LT           | Osram        | Daylight tubes L 15 W/865    | 1500 - 9000 | 20-122                                              | 3         |
| TB           | uns.         | uns.                         | 750         | 15                                                  | 4,5       |
| TB           | uns.         | 60 W                         | 1000        | 20                                                  | 6         |
| HL           | uns.         | 60 W, 750 lumens, soft white | 2840        | 40                                                  | 7         |

LT, luminescent tube; TB, tungsten bulb; HL, halogen lamp; uns, unspecified.

\*Values colored in blue were calculated using the following equivalences: LT) 74 lux = 1  $\mu\text{mol}\cdot\text{m}^{-2}\cdot\text{s}^{-1}$ ; TB) 50 lux = 1  $\mu\text{mol}\cdot\text{m}^{-2}\cdot\text{s}^{-1}$ ; HL) 71 lux = 1  $\mu\text{mol}\cdot\text{m}^{-2}\cdot\text{s}^{-1}$  (Ref. 8), for the sake of comparison. LED coefficient was estimated in 53 using the on-line calculator of Ref. 9.

**Table S2: Oligonucleotides used in this study to corroborate mutations in strains 1.4-2B and 1.7-3A**

| Strain | Position  | Locus     | Sequence              |                      |
|--------|-----------|-----------|-----------------------|----------------------|
|        |           |           | Forward               | Reverse              |
| 1.4-2B | 1,111,548 | Rru_A0933 | CGAGTTCGCCCCGCTATTGT  | CCAGGGCTCCCAGATTCTTC |
| 1.4-2B | 1,486,030 | Rru_A1264 | TGTTGACGATCACCCCTTG   | TCACACGTCGGCTCGATAAG |
| 1.4-2B | 1,684,048 | Rru_A1424 | CCATCATGACGCTGTTTCGC  | AAGTTTGCGGATGGCTGTTG |
| 1.4-2B | 3,782,100 | -         | CCACCCGATGCCCCATGC    | GCTCATCAGCCTTGCTCGC  |
| 1.7-3A | 742,958   | Rru_A0625 | GATCGAGAACGAGATTATTCC | GGCCCCCATAGACCGACGC  |
| 1.7-3A | 866,180   | Rru_A0741 | GGGAAGGTCAGGGTCCACAG  | TACGACATTCAAAGCGAACC |
| 1.7-3A | 1,487,040 | Rru_A1265 | GTTCGCCATCCTGAAATGTCG | CCGATCATTTCTCGTTGCC  |
| 1.7-3A | 1,857,111 | Rru_A1576 | GCGGAAATCGTCTCCCATC   | AGGAATCGACCAGCGGCT   |
| 1.7-3A | 3,025,390 | Rru_A2602 | CGCCTGGAAAGCCACATCACC | AGATCGCCAAGCAGAACGAG |
| 1.7-3A | 3,820,243 | -         | GACATAGGCATTTCCATAGA  | GGTGGTGGTTATCCGTG    |
| Both   | 826,816   | Rru_A0697 | TGGCTGATCCTTTGGCATAAC | CCCATCATCATCATCGAGGC |

**Table S3: Growth parameters of strains S1 and Rr02\_01 grown under light with an initial ppCO of 0.6 bar**

| Parameter                               | S1            | Rr02_01       | T-Student |
|-----------------------------------------|---------------|---------------|-----------|
| $\mu_{\text{max}}$ (day <sup>-1</sup> ) | 1.78 ± 0.03   | 1.71 ± 0.13   | 4.19E-01  |
| $\mu_2$ (day <sup>-1</sup> )            | 0.045 ± 0.004 | 0.066 ± 0.009 | 2.61E-02  |
| Final OD <sub>660</sub>                 | 4.0 ± 0.2     | 4.9 ± 0.4     | 2.73E-02  |
| Final PMP                               | 1.56 ± 0.01   | 2.15 ± 0.06   | 7.62E-05  |

$\mu_2$ ; growth rate of the second growth phase.

The final OD and PMP were calculated at the end of the second growth phase (~18 days).

Numbers in red denote significance (p-value < 0.05, n=3)

## References

1. Bayon-Vicente G, Marchand E, Ducrotois J, Dufrasne FE, Hallez R, Wattiez R, Leroy B, (2021). Analysis of the Involvement of the Isoleucine Biosynthesis Pathway in Photoheterotrophic Metabolism of *Rhodospirillum rubrum*. *Front Microbiol*, 12:731976. <https://doi.org/10.3389/fmicb.2021.731976>
2. Kaftan D, Bina D, Koblížek M. (2019). Temperature dependence of photosynthetic reaction centre activity in *Rhodospirillum rubrum*. *Photosynth Res* 142, 181–193. <https://doi.org/10.1007/s11120-019-00652-7>
3. Porter J, Merrett MJ, (1972). Influence of Light Intensity on Reductive Pentose Phosphate Cycle Activity during Photoheterotrophic Growth of *Rhodospirillum rubrum*. *Plant Physiol*, 50, (2). <https://doi.org/10.1104/pp.50.2.252>
4. Grammel H, Gilles ED, Ghosh R (2003). Microaerophilic cooperation of reductive and oxidative pathways allows maximal photosynthetic membrane biosynthesis in *Rhodospirillum rubrum*. *Appl Environ Microbiol*. 69(11):6577-86. <https://doi.org/10.1128/AEM.69.11.6577-6586.2003>
5. Carius AB, Henkel M, Grammel H, (2011). A glutathione redox effect on photosynthetic membrane expression in *Rhodospirillum rubrum*. *J Bacteriol*, 193(8), 1893-900. <https://doi.org/10.1128/JB.01353-10>
6. Hosseini SS, Aghbashlo M, Tabatabaei M, Younesi H, Najafpour G, (2015). Exergy analysis of biohydrogen production from various carbon sources via anaerobic photosynthetic bacteria (*Rhodospirillum rubrum*). *Energy*, 93(1) 730-739. <https://doi.org/10.1016/j.energy.2015.09.060>
7. McCully AL, Onyeziri MC, LaSarre B, Gliessman JR, McKinlay JB, (2019). Reductive tricarboxylic acid cycle enzymes and reductive amino acid synthesis pathways contribute to electron balance in a *Rhodospirillum rubrum* Calvin-cycle mutant. *Microbiol*, 166(2), 199–211. <https://doi.org/10.1099/mic.0.000877>
8. Thimijan RW, Heins RD, (1983). Photometric, Radiometric, and Quantum Light Units of Measure: A Review of Procedures for Interconversion. *HortScience*, 18(6), 818-822. <https://doi.org/10.21273/HORTSCI.18.6.818>
9. <https://www.waveformlighting.com/horticulture/convert-ppfd-to-lux-online-calculator>
